# Supplementary material
Source: publisher figshare collection journal article supplement (https://tandf.figshare.com/articles/dataset/_/21646768)
Supplement: Supplementary file 1 [file 1]

## Appendix 1. Search strategy for data sources.

### PubMed

#### No. Query

- #1 (COVID-19 Vaccines[MeSH]) OR (COVID 19 Vaccines[Title/Abstract]) OR (Vaccines, COVID-19[Title/Abstract]) OR (SARS Coronavirus 2 Vaccines[Title/Abstract]) OR (COVID19 Virus Vaccines[Title/Abstract]) OR (Vaccines, COVID19 Virus[Title/Abstract]) OR (Virus Vaccines, COVID19[Title/Abstract]) OR (COVID19 Virus Vaccine[Title/Abstract]) OR (Vaccine, COVID19 Virus[Title/Abstract]) OR (Virus Vaccine, COVID19[Title/Abstract]) OR (COVID19 Vaccines[Title/Abstract]) OR (Vaccines, COVID19[Title/Abstract]) OR (COVID19 Vaccine[Title/Abstract]) OR (Vaccine, COVID19[Title/Abstract]) OR (SARS-CoV-2 Vaccines[Title/Abstract]) OR (SARS CoV 2 Vaccines[Title/Abstract]) OR (Vaccines, SARS-CoV-2[Title/Abstract]) OR (SARS-CoV-2 Vaccine[Title/Abstract]) OR (Vaccine, SARS-CoV-2[Title/Abstract]) OR (SARS2 Vaccines[Title/Abstract]) OR (Vaccines, SARS2[Title/Abstract]) OR (SARS2 Vaccine[Title/Abstract]) OR (Vaccine, SARS2[Title/Abstract]) OR (Coronavirus Disease 2019 Vaccines[Title/Abstract]) OR (Coronavirus Disease 2019 Vaccine[Title/Abstract]) OR (Coronavirus Disease 2019 Virus Vaccine[Title/Abstract]) OR (Coronavirus Disease 2019 Virus Vaccines[Title/Abstract]) OR (Coronavirus Disease-19 Vaccines[Title/Abstract]) OR (Coronavirus Disease 19 Vaccines[Title/Abstract]) OR (Vaccines, Coronavirus Disease-19[Title/Abstract]) OR (Coronavirus Disease-19 Vaccine[Title/Abstract]) OR (Coronavirus Disease 19 Vaccine[Title/Abstract]) OR (Vaccine, Coronavirus Disease-19[Title/Abstract]) OR (COVID 19 Vaccine[Title/Abstract]) OR (Vaccine, COVID 19[Title/Abstract]) OR (2019-nCoV Vaccine[Title/Abstract]) OR (2019 nCoV Vaccine[Title/Abstract]) OR (Vaccine, 2019-nCoV[Title/Abstract]) OR (2019 Novel Coronavirus Vaccines[Title/Abstract]) OR (2019 Novel Coronavirus Vaccine[Title/Abstract]) OR (2019-nCoV Vaccines[Title/Abstract]) OR (2019 nCoV Vaccines[Title/Abstract]) OR (Vaccines, 2019-nCoV[Title/Abstract]) OR (COVID-19 Vaccine[Title/Abstract]) OR (Vaccine, COVID-19[Title/Abstract]) OR (COVID-19 Virus Vaccines[Title/Abstract]) OR (COVID 19 Virus Vaccines[Title/Abstract]) OR (Vaccines, COVID-19 Virus[Title/Abstract]) OR (Virus Vaccines, COVID-19[Title/Abstract]) OR (COVID-19 Virus Vaccine[Title/Abstract]) OR (COVID 19 Virus Vaccine[Title/Abstract]) OR (Vaccine, COVID-19 Virus[Title/Abstract]) OR (Virus Vaccine, COVID-19[Title/Abstract])
- #2 (Myocarditis[MeSH]) OR (Myocarditis[Text Word]) OR (Myocarditides[Text Word]) OR (Carditis[Text Word]) OR (Myopericarditis [Text Word]) OR (Cardiac inflammations[Text Word])
- #3 (Myocardial Infarction[MeSH]) OR (Myocardial Infarction[Text Word]) OR (Infarction, Myocardial[Text Word]) OR (Infarctions, Myocardial[Text Word]) OR (Myocardial Infarctions[Text Word]) OR (Cardiovascular Stroke[Text Word]) OR (Cardiovascular Strokes[Text Word]) OR (Stroke, Cardiovascular[Text Word]) OR (Strokes, Cardiovascular[Text Word]) OR (Myocardial Infarct[Text Word]) OR (Infarct, Myocardial[Text Word]) OR (Infarcts, Myocardial[Text Word]) OR (Myocardial Infarcts[Text Word]) OR (Heart Attack[Text Word]) OR (Heart Attacks[Text Word]) OR (Heart Rupture, Post-Infarction[Text Word])
- #4 (Arrhythmias, Cardiac[MeSH]) OR (Arrhythmias, Cardiac[Text Word]) OR (Arrhythmia, Cardiac[Text Word]) OR (Cardiac Dysrhythmia[Text Word]) OR (Dysrhythmia, Cardiac[Text Word]) OR (Cardiac Arrhythmia[Text Word]) OR (Cardiac Arrhythmias[Text Word]) OR (Arrhythmia[Text Word]) OR (Arrhythmia[Text Word]) OR (Anti-Arrhythmia Agents[Text Word]) OR (Electric Countershock[Text Word])
- #5 (Cardiovascular events[Text Word]) OR (Cardiac events[Text Word])
- #6 #2 OR #3 OR #4 OR #5
- #7 (#1) AND (#6) AND ("2020/01/01"[Date - Publication] : "2022/06/15"[Date - Publication])  
Publication date from 2020/01/01 to 2022/06/15

## EMBASE

### No. Query

- #1 ('sars-cov-2 vaccine'/exp OR '2019-ncov vaccine':ti,ab,kw OR '2019-ncov virus vaccine':ti,ab,kw OR 'covid 19 vaccine':ti,ab,kw OR 'covid-19 mrna vaccine':ti,ab,kw OR 'covid-19 recombinant protein vaccine':ti,ab,kw OR 'covid-19 vaccine':ti,ab,kw OR 'covid-19 vaccines':ti,ab,kw OR 'covid-19 virus vaccine':ti,ab,kw OR 'covid19 vaccine':ti,ab,kw OR 'covid19 virus vaccine':ti,ab,kw OR 'hcov-19 vaccine':ti,ab,kw OR 'hcov-19 virus vaccine':ti,ab,kw OR 'human coronavirus 2019 vaccine':ti,ab,kw OR 'sars coronavirus 2 vaccine':ti,ab,kw OR 'sars-cov-2 inactivated vaccine':ti,ab,kw OR 'sars-cov-2 mrna vaccine':ti,ab,kw OR 'sars-cov-2 recombinant protein vaccine':ti,ab,kw OR 'sars-cov-2 vaccine':ti,ab,kw OR 'sars-cov-2 virus vaccine':ti,ab,kw OR 'sars2 vaccine':ti,ab,kw OR 'sars2 virus vaccine':ti,ab,kw OR 'coronavirus disease 2019 vaccine':ti,ab,kw OR 'inactivated covid-19 vaccine':ti,ab,kw OR 'inactivated sars-cov-2 vaccine':ti,ab,kw OR 'mrna covid-19 vaccine':ti,ab,kw OR 'mrna sars-cov-2 vaccine':ti,ab,kw OR 'ncov-2019 vaccine':ti,ab,kw OR 'ncov-2019 virus vaccine':ti,ab,kw OR 'novel 2019 coronavirus vaccine':ti,ab,kw OR 'novel coronavirus 2019 vaccine':ti,ab,kw OR 'severe acute respiratory syndrome 2 vaccine':ti,ab,kw OR 'severe acute respiratory syndrome coronavirus 2 vaccine')
- #2 'myocarditis'/exp OR 'cardiomyocyte inflammation' OR 'cardiomyopathic inflammatory process' OR 'inflammation, myocardial' OR 'inflammatory cardiomyopathy' OR 'inflammatory myocardiopathy' OR 'myocard inflammation' OR 'myocardial inflammation' OR 'myocarditis'
- #3 'heart infarction'/exp OR 'cardiac infarct' OR 'cardiac infarction' OR 'cardial infarct' OR 'heart attack' OR 'heart infarct' OR 'heart infarction' OR 'heart micro infarction' OR 'heart muscle infarction' OR 'infarction, heart' OR 'myocardial infarct' OR 'myocardial infarction' OR 'myocardium infarct' OR 'myocardium infarction' OR 'premonitory infarction sign' OR 'second heart attack' OR 'subendocardial infarction' OR 'transmural cardiac infarction' OR 'transmural heart infarction' OR 'transmural infarction, heart'
- #4 'heart arrhythmia'/exp OR 'arrhythmia' OR 'arrhythmias, cardiac' OR 'arrhythmia, heart' OR 'cardiac arrhythmia' OR 'cardiac arrhythmias' OR 'cardiac arrhythmia' OR 'cardiac dysrhythmia' OR 'cardiac dysrhythmia' OR 'cardial arrhythmia' OR 'ectopic heart rhythm' OR 'ectopic rhythm' OR 'heart aberrant conduction' OR 'heart arrhythmia' OR 'heart arrhythmia' OR 'heart arrhythmia' OR 'heart dysrhythmia' OR 'heart ectopic beat' OR 'heart ectopic ventricle contraction' OR 'heart rhythm disorder' OR 'myocardial arrhythmia'
- #5 'cardiovascular event'/exp OR 'cardiac event'
- #6 #2 OR #3 OR #4 OR #5
- #7 #1 AND #6 AND [15-6-2022]/sd

## Web of Science

### No. Query

- #1 TS= ((COVID-19 Vaccines) OR (COVID 19 Vaccines) OR (Vaccines, COVID-19) OR (SARS Coronavirus 2 Vaccines) OR (COVID19 Virus Vaccines) OR (Vaccines, COVID19 Virus) OR (Virus Vaccines, COVID19) OR (COVID19 Virus Vaccine) OR (Vaccine, COVID19 Virus) OR (Virus Vaccine, COVID19) OR (COVID19 Vaccines) OR (Vaccines, COVID19) OR (COVID19 Vaccine) OR (Vaccine, COVID19) OR (SARS-CoV-2 Vaccines) OR (SARS CoV 2 Vaccines) OR (Vaccines, SARS-CoV-2) OR (SARS-CoV-2 Vaccine) OR (SARS CoV 2 Vaccine) OR (Vaccine, SARS-CoV-2) OR (SARS2 Vaccines) OR (Vaccines, SARS2) OR (SARS2 Vaccine) OR (Vaccine, SARS2) OR (Coronavirus Disease 2019 Vaccines) OR (Coronavirus Disease 2019 Vaccine) OR (Coronavirus Disease 2019 Virus Vaccine) OR (Coronavirus Disease 2019 Virus Vaccines) OR (Coronavirus Disease-19 Vaccines) OR (Coronavirus Disease 19 Vaccines) OR (Vaccines, Coronavirus Disease-19) OR (Coronavirus Disease-19 Vaccine) OR (Coronavirus Disease 19 Vaccine) OR (Vaccine,

Coronavirus Disease-19) OR (COVID 19 Vaccine) OR (Vaccine, COVID 19) OR (2019-nCoV Vaccine) OR (2019 nCoV Vaccine) OR (Vaccine, 2019-nCoV) OR (2019 Novel Coronavirus Vaccines) OR (2019 Novel Coronavirus Vaccine) OR (2019-nCoV Vaccines) OR (2019 nCoV Vaccines) OR (Vaccines, 2019-nCoV) OR (COVID-19 Vaccine) OR (Vaccine, COVID-19) OR (COVID-19 Virus Vaccines) OR (COVID 19 Virus Vaccines) OR (Vaccines, COVID-19 Virus) OR (Virus Vaccines, COVID-19) OR (COVID-19 Virus Vaccine) OR (COVID 19 Virus Vaccine) OR (Vaccine, COVID-19 Virus) OR (Virus Vaccine, COVID-19))

#2 TS=((Myocarditis) OR (Myocarditides) OR (Carditis) OR (Myopericarditis) OR (Cardiac inflammations))

#3 TS=((Myocardial Infarction) OR (Infarction, Myocardial) OR (Infarctions, Myocardial) OR (Myocardial Infarctions) OR (Cardiovascular Stroke) OR (Cardiovascular Strokes) OR (Stroke, Cardiovascular) OR (Strokes, Cardiovascular) OR (Myocardial Infarct) OR (Infarct, Myocardial) OR (Infarcts, Myocardial) OR (Myocardial Infarcts) OR (Heart Attack) OR (Heart Attacks) OR (Heart Rupture, Post-Infarction))

#4 TS=((Arrhythmias, Cardiac) OR (Arrhythmia, Cardiac) OR (Cardiac Dysrhythmia) OR (Dysrhythmia, Cardiac) OR (Cardiac Arrhythmia) OR (Cardiac Arrhythmias) OR (Arrhythmia) OR (Arrhythmia) OR (Anti-Arrhythmia Agents) OR (Electric Countershock))

#5 TS=(Cardiovascular events) OR (Cardiac events)

#6 #2 OR #3 OR #4 OR #5

#7 #1 AND #6 AND (Publication date from 2020-01-01 to 2022-06-15)
