# Supplementary material
Source: publisher figshare collection journal article supplement (https://tandf.figshare.com/articles/dataset/_/21646768)
Supplement: Supplementary file 2 [file 1]

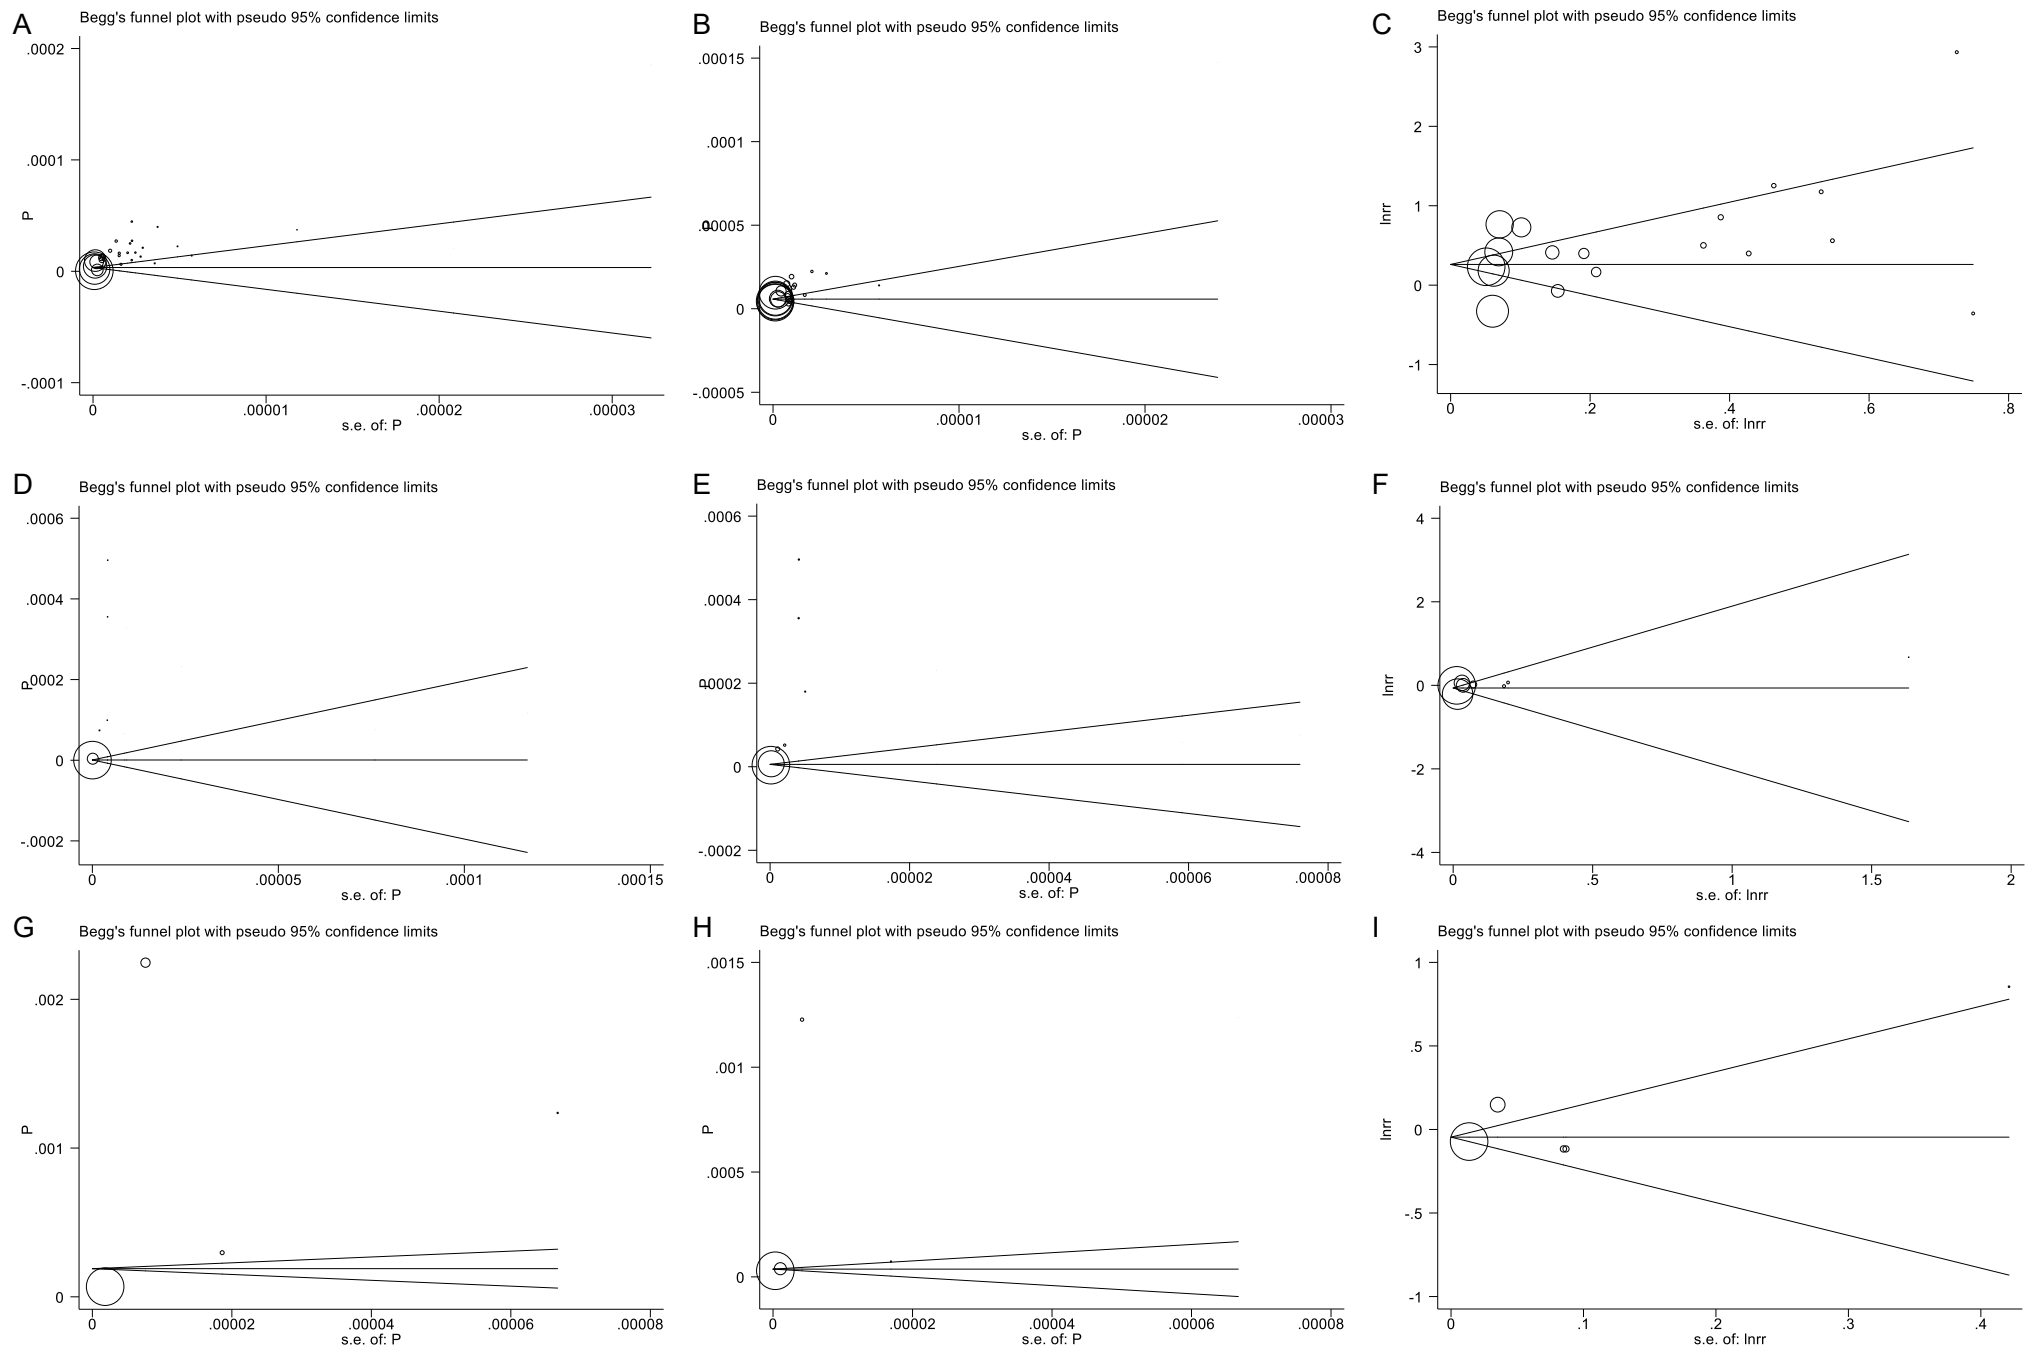

Figure S1. Funnel plot and Begg's test for (A) myocarditis incidence rate in total persons ( $P = 0.063$ ); (B) myocarditis incidence rate in total doses ( $P = 0.102$ ); (C) myocarditis risk ratio ( $P = 0.544$ ); (D) myocardial infarction incidence rate in total persons ( $P = 0.533$ ); (E) myocardial infarction incidence rate in total doses ( $P = 1.000$ ); (F) myocardial infarction risk ratio ( $P = 0.174$ ); (G) cardiac arrhythmia incidence rate in total persons ( $P = 0.734$ ); (H) cardiac arrhythmia incidence rate in total doses ( $P = 0.221$ ); (I) cardiac arrhythmia risk ratio ( $P = 0.462$ ).
