# Supplementary material
Source: publisher figshare collection journal article supplement (https://tandf.figshare.com/articles/dataset/_/21646768)
Supplement: Supplementary file 3 [file 1]

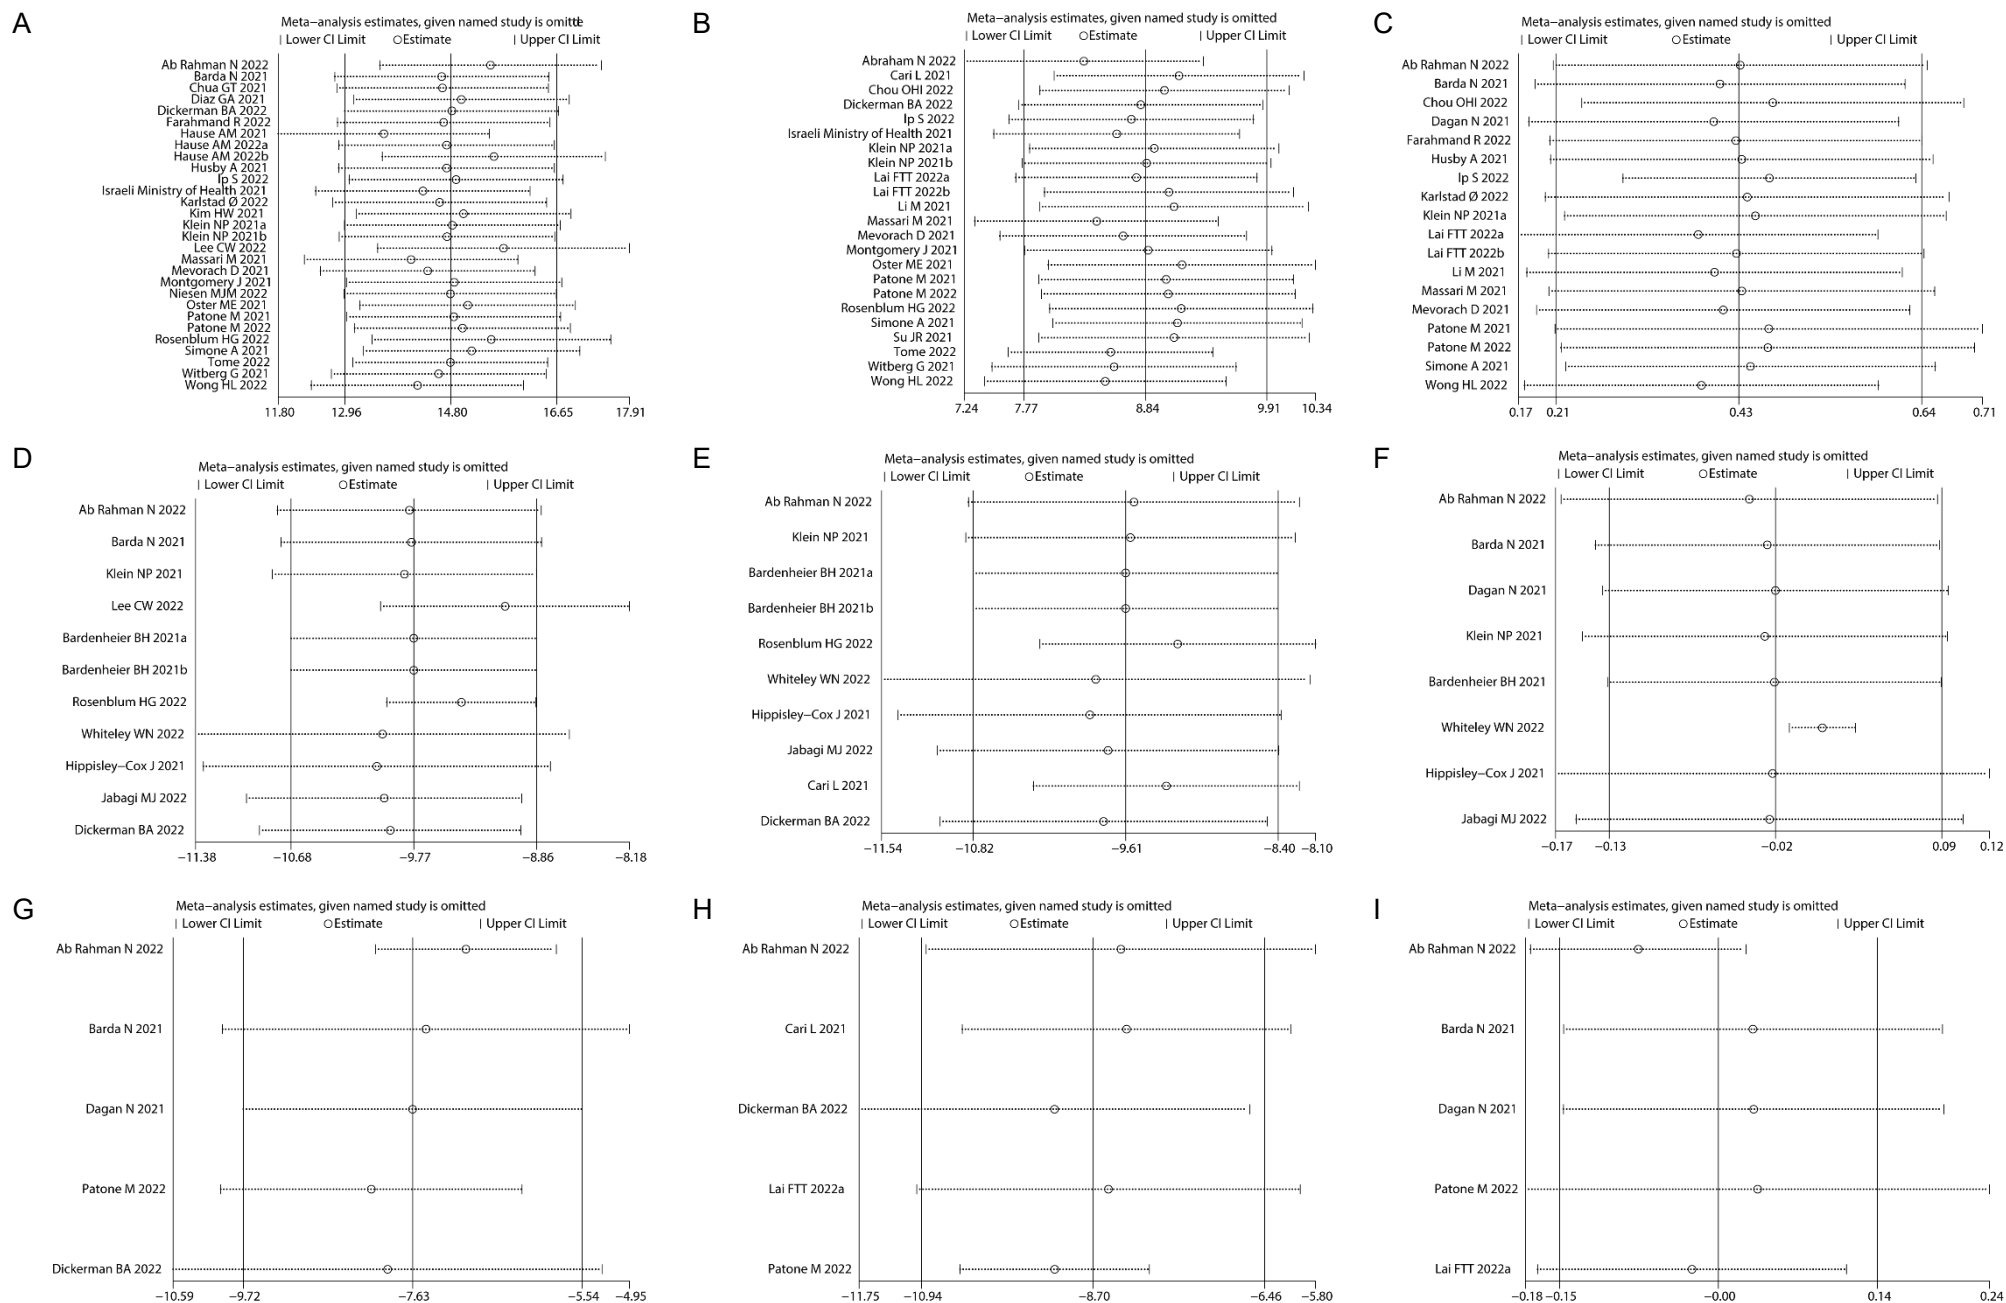

Figure S2. Sensitivity analysis for (A) myocarditis events rate in total persons; (B) myocarditis events rate in total doses; (C) myocarditis risk ratio; (D) myocardial infarction events rate in total persons; (E) myocardial infarction events rate in total doses; (F) myocardial infarction risk ratio; (G) cardiac arrhythmia incidence rate in total persons; (H) cardiac arrhythmia events rate in total doses; (I) cardiac arrhythmia risk ratio.
